# Supplementary material
Source: PubMed Central journal article supplement (PMC4836620)
Supplement: NIHMS750681-supplement-supplement_1.pdf [file NIHMS750681-supplement-supplement_1.pdf]

**Supplementary Table 1. Features of control subjects**

| Age (years) | Sex – Race | Cause of death                  | PMI (hours) | Tissue pH | Toxicology                         |
|-------------|------------|---------------------------------|-------------|-----------|------------------------------------|
| 66          | M – AA     | CVD                             | 12.5        | 6.69      | <i>n.d.</i>                        |
| 65          | F – Cauc   | CVD                             | 26          | 6.18      | <i>n.d.</i>                        |
| 61          | M – Cauc   | atherosclerotic CVD             | 16          | 6.72      | <i>n.d.</i>                        |
| 32          | M – Cauc   | blunt trauma to head and body   | 25          | 6.88      | <i>n.d.</i>                        |
| 43          | M – Hisp   | crush injuries to head and body | 21.8        | 6.58      | <i>n.d.</i>                        |
| 53          | M – Cauc   | gastric hemorrhage              | 26.5        | 6.58      | meperidine, promethazine, morphine |
| 50          | M – Cauc   | atherosclerotic CVD             | 22.5        | 6.78      | <i>n.d.</i>                        |
| 56          | M – Cauc   | blunt trauma to head and body   | 27.2        | 6.86      | pseudoephedrine                    |
| 60          | F – Cauc   | atherosclerotic CVD             | 17.2        | .         | <i>n.d.</i>                        |
| 54          | M – Cauc   | post-surgical complication      | 26.5        | 6.50      | morphine                           |
| 62          | M – Cauc   | MCI                             | 21          | .         | <i>n.d.</i>                        |
| 18          | M – AA     | bronchial asthma                | 31.2        | 6.40      | midazolam                          |
| 56          | F – AA     | hypertrophic cardiomyopathy     | 16.8        | 6.09      | <i>n.d.</i>                        |
| 65          | M – Cauc   | CVD                             | 22.2        | 6.60      | <i>n.d.</i>                        |
| 61          | M – AsA    | CVD                             | 30.5        | 6.61      | lidocaine                          |
| 50          | F – AA     | hypertrophic cardiomyopathy     | 20          | 6.81      | <i>n.d.</i>                        |
| 28          | M – AA     | bronchial asthma                | 35.5        | 6.32      | <i>n.d.</i>                        |

Sex-race: F, female; M, male; AA, African-American; AsA, Asian-American; Cauc, Caucasian; Hisp, Hispanic. Cause of death (Type): CVD, cardiovascular disease; MCI, myocardial infarction. Tissue pH: “.”, frozen tissue not available. Toxicology: CO, carbon monoxide; *n.d.*, nothing detected.

**Supplementary Table 2. Features of subjects with major depressive disorder (MDD)**

| Age (years) | Sex – Race | Cause of death (Type)                                            | PMI (hours) | Tissue pH | Toxicology                                           | Current psychotropic prescription                     |
|-------------|------------|------------------------------------------------------------------|-------------|-----------|------------------------------------------------------|-------------------------------------------------------|
| 79          | M – Cauc   | electrocution (S)                                                | 21.5        | .         | sertraline                                           | sertraline, temazepam                                 |
| 65          | M – Cauc   | SIGSW (S)                                                        | 30          | 6.24      | codeine                                              | unknown                                               |
| 41          | M – Cauc   | CO poisoning (S)                                                 | 16          | .         | ethanol, CO                                          | none                                                  |
| 52          | M – AA     | SIGSW (S)                                                        | 10          | .         | <i>n.d.</i>                                          | none                                                  |
| 48          | M – Cauc   | aortic dissection                                                | 16.5        | 6.26      | <i>n.d.</i>                                          | none                                                  |
| 48          | F – Cauc   | hanging (S)                                                      | 6.5         | .         | citalopram, trazodone                                | quetiapine, oxcarbazepine, aripiprazole, escitalopram |
| 49          | M – Cauc   | atherosclerotic coronary artery disease with cardiomegaly        | 27.5        | .         | diazepam, desipramine, lidocaine                     | imipramine, diazepam                                  |
| 19          | M – Cauc   | SIGSW (S)                                                        | 24.2        | 6.82      | cannabinoids                                         | fluoxetine, amphetamine/dextro-amphetamine            |
| 61          | F – Cauc   | SIGSW (S)                                                        | 37.8        | 6.66      | <i>n.d.</i>                                          | none                                                  |
| 56          | F – Cauc   | acute bronchopneumonia, DM                                       | 38          | 5.61      | doxylamine                                           | none                                                  |
| 54          | M – Cauc   | atherosclerotic coronary artery disease, squamous cell carcinoma | 38          | 6.54      | fluoxetine, dextromethorphan                         | fluoxetine                                            |
| 50          | F – Cauc   | atherosclerotic CVD                                              | 28.5        | 6.47      | dextromethorphan                                     | imipramine                                            |
| 51          | M – Cauc   | hypertensive and atherosclerotic cardiomyopathy                  | 11.5        | 6.42      | lorazepam, bupropion, citalopram                     | bupropion, citalopram, lorazepam, temazepam           |
| 44          | F – Cauc   | SIGSW (S)                                                        | 29          | 6.71      | bupropion, diphenhydramine, venlafaxine, hydrocodone | bupropion, venlafaxine, hydrocodone                   |
| 59          | M – Cauc   | CO poisoning (S)                                                 | 26.8        | 6.22      | CO, fluoxetine                                       | fluoxetine                                            |
| 37          | M – AA     | SIGSW (S)                                                        | 31.5        | 6.71      | ethanol                                              | none                                                  |

---

|    |           |                            |    |      |             |      |
|----|-----------|----------------------------|----|------|-------------|------|
| 62 | M -<br>AA | CVD, obesity,<br>emphysema | 22 | 6.06 | <i>n.d.</i> | none |
|----|-----------|----------------------------|----|------|-------------|------|

---

Sex-race: F, female; M, male; AA, African-American; Cauc, Caucasian. Cause of death (Type): S, suicide; CO, carbon monoxide; CVD, cardiovascular disease; DM, diabetes mellitus; SIGSW, self-inflicted gunshot wound. Tissue pH: ".", frozen tissue not available. Toxicology: CO, carbon monoxide; *n.d.*, nothing detected.

**Supplementary Table 3. Clinical characteristics of subjects with Major Depressive Disorder (MDD)**

| <b>Age of onset of MDD (years)</b> | <b>Duration of MDD (years)</b> | <b>Single-episode, recurrent, or chronic MDD</b> |
|------------------------------------|--------------------------------|--------------------------------------------------|
| 79                                 | 0.17                           | single                                           |
| 65                                 | 0.08                           | single                                           |
| 41                                 | 0.33                           | single                                           |
| 55                                 | 0.25                           | single                                           |
| 39                                 | 6                              | recurrent                                        |
| 20                                 | 20                             | recurrent                                        |
| 47                                 | 10                             | chronic                                          |
| 14.5                               | 4.5                            | recurrent                                        |
| 49                                 | 12                             | recurrent                                        |
| 55                                 | 1                              | single                                           |
| 32.5                               | 20                             | recurrent                                        |
| 32.5                               | 15                             | chronic, in remission last few years             |
| 16                                 | 35                             | chronic                                          |
| 33                                 | 11                             | recurrent                                        |
| 54                                 | 5                              | recurrent                                        |
| 37                                 | 0.08                           | single                                           |
| 49                                 | 13                             | recurrent                                        |

**Supplementary Table 4. Parameters for determining astrocyte density**

|              | <b>Disector dimensions (<math>\mu\text{m}</math>)</b> | <b>Grid dimensions (<math>\mu\text{m}</math>)</b> |
|--------------|-------------------------------------------------------|---------------------------------------------------|
| <b>CA1</b>   | 225 (X) $\times$ 140 (Y) $\times$ 25 (Z)              | 250 (X) $\times$ 250 (Y)                          |
| <b>CA2/3</b> | 215 (X) $\times$ 130 (Y) $\times$ 9 (Z)               | 250 (X) $\times$ 250 (Y)                          |
| <b>Hilus</b> | 150 (X) $\times$ 150 (Y) $\times$ 9 (Z)               | 300 (X) $\times$ 300 (Y)                          |
